# Supplementary material for: Lipoadenoma of the Parathyroid Gland: Characterization of an Institutional Series Spanning 28 Years
Source: Endocr Pathol. 2020 Mar 19;31(2):156–65. doi: 10.1007/s12022-020-09616-3 (PMC7250804; doi:10.1007/s12022-020-09616-3)
Supplement: Supplementary file 1 — (XLSX 14 kb) [file 12022_2020_9616_MOESM1_ESM.xlsx]

## Sheet: Blad1
Supplementary Table 1. Detailed overview of all patients enlisted in the current study
Patient no.	Age at surgery	Gender	Diagnosis after reevaluation	Preoperative total serum calcium (ref: 2.15-2.50 mmol/L)	Preopoerative ionized serum calcium (ref: 1.15-1.33 mmol/L)	Plasma PTH (ref: 10-65 ng/L)	Plasma PTH (ref: 1.6-6.0 pmol/L )	Disease presentation (cause of PHPT investigation)	Familiy history of PHPT	Radiology	Fracture	Bone mineral density results	T-score LS	T-score FN	FU time (years)	Year of initial surgery	Frozen section	Surgical complication	Length of hospital stay (days)	Tumor weight (mg)	MEN1 screening	Hypertension	Other tumors	Other diseases of interest	Medication	Smoker	BMI	Persistent or recurrent hypercalcemia	Dead/alive
1	47	M	PLA	3	N.d.	100	N.d.	En passant laboratory investigations (hypercalcemia)	None	US + scintigraphy pos	None	N.d.	N.d.	N.d.	14	2006	Yes	None	1	900	Negative	Yes	None	None	Anti-hypertensive	No	29.2	No	Alive
2	60	F	PLA	2.48	1.38	124	N.d.	Fatigue. concentration difficulty	None	US + scintigraphy pos	Distal radius, pelvis	Osteopenia	N.d.	-1.3	12	2008	No	None	1	278	N.d.	Yes	None	None	Anti-hypertensive, hormonal replacement therapy	No	25.5	No	Alive
3	80	F	PLA	2.49	1.35	73	N.d.	Osteoporosis investigation	None	US neg. scintigraphy pos	Distal radius, vertebral compressions	Osteoporosis	-2.1	-2.6	11	2009	Yes	None	1	165	N.d.	Yes	None	None	Anti-hypertensive, simvastatin	No	25.6	No	Alive
4	82	F	PLA	2.81	1.46	101	N.d.	Muscle pain. fatigue	None	US + scintigraphy pos	None	N.d.	N.d.	N.d.	11	2009	No	None	1	490	N.d.	Yes	Breast cancer 2002	None	Anti-hypertensive	No	20.7	No	Alive
5	66	F	PLA	2.47	1.36	71	N.d.	Osteoporosis investigation	None	US + scintigraphy pos	None	Osteopenia	-2.2	-1.5	10	2010	No	None	1	530	N.d.	No	None	Goiter	Alendronate	No	26.3	No	Alive
6	57	M	PLA	2.61	1.45	77	N.d.	Renal stone	None	US + scintigraphy uncertain	None	N.d.	N.d.	N.d.	4	2011	No	None	1	363	N.d.	Yes	None	Obesity	Anti-hypertensive, metformin, simvastatin	No	49.5	No	Alive
7	61	M	PLA	2.91	1.52	N.d.	36	Depression	None	N.d.	None	N.d.	N.d.	N.d.	6	2014	No	(Hypocalcemia)	2	312	N.d.	Yes	Follicular thyroid adenoma	Sleep apnea	Anti-hypertensive	No	33	Persistent	Alive
8	73	F	PLA	2.53	1.41	N.d.	12	Memory loss	None	US neg. scintigraphy pos	None	Osteoporosis	N.d.	N.d.	2	2018	No	None	1	525	N.d.	No	None	Goiter	None	Previous	25.9	No	Alive
9	53	F	Equivocal PLA	N.d.	1.48	115	N.d.	Fatigue	Mother with PHPT (subtotal parathyroidectom;. 3.5 glands removed)	US + scintigraphy neg	None	N.d.	N.d.	N.d.	8	2012	No	None	1	286	Negative	Yes	None	Hyperlipidemia	Anti-hypertensive, simvastatin	No	23.1	No	Alive
10	74	F	Equivocal PLA	2.75	1.47	N.d.	9.8	Fatigue	None	US + scintigraphy neg	None	Osteopenia	2.4	-1.1	6	2015	No	None	2	322	N.d.	Yes	Synovial chondroma 1994	AMI 1997 and 2012. Thoracic aortic dissection 2004.	Anti-hypertensive, metformin	Previous	34.3	No	Dead
11	50	M	Lipohyperplasia	2.79	1.41	N.d.	5	En passant laboratory investigations (hypercalcemia)	None	US + scintigraphy uncertain	None	Normal	1.6	1.1	3	2016	No	None	1	115/180	N.d.	No	None	Deep vein thrombosis 2015	None	Previous	25.1	Persistent	Alive
12	52	F	FRPPG	2.67	1.32	57	N.d.	Osteoporosis investigation	None	N.d.	None	Osteoporosis	-3	-1	14	2005	No	None	1	325	N.d.	No	None	Ulcerative colitis	Imurel and prednisolone	Previous	30	No	Alive
13	80	M	FRPPG	2.75	1.55	149	N.d.	En passant laboratory investigations (hypercalcemia)	None	US neg. scintigraphy pos	None	N.d.	N.d.	N.d.	13	2007	No	None	1	281	N.d.	Yes	None	None	Aspirin	No	29	No	Alive
14	61	F	FRPPG	2.62	1.42	202	N.d.	Lithium induced HPT	None	N.d.	None	Normal	1	1	1	2010	No	None	1	183	N.d.	No	Breast cancer 2010	Schizoaffective disorder	Lithium, neurolepticum, levothyroinine	Yes	26.8	No	Dead
15	61	F	FRPPG	N.d	1.35	82	N.d.	Osteoporosis investigation	Sister and mother diagnosed with PHPT	N.d.	None	Osteoporosis	-2.5	-2.5	7	2013	No	(Cervical hematoma)	2	209	Negative	Yes	None	Asthma	Bronchodilators	No	23.3	Persistent	Alive
16	39	F	FRPPG	2.58	1.46	110	12.4	En passant laboratory investigations (hypercalcemia)	None	US + scintigraphy pos	None	Normal	0	0	6	2014	No	None	1	222	Negative	No	None	None	None	No	27.3	No	Alive
17	67	F	FRPPG	2.86	1.4	N.d.	19	En passant laboratory investigations (hypercalcemia)	None	US neg. scintigraphy pos	None	Osteopenia	0.3	-2	5	2014	No	None	1	363	N.d.	No	None	Cardiac arrhythmia	Anti-hypertensive	No	20.2	Recurrent	Alive
18	72/73	M	FRPPG	3	1.63	N.d.	13.6	En passant laboratory investigations (hypercalcemia)	None	US + scintigraphy uncertain	None	N.d.	N.d.	N.d.	4	2016	No	None	1	155/119	N.d.	No	None	Deep vein thrombosis	Rivaroxaban	No	25.6	Persistent	Alive
M; Male, F; Female, PLA; parathyroid lipoadenoma, FRPPG; fat-rich pathological parathyroid gland, approx.; approximately, n.d.; not determined, neg; negative, pos; positive, PHPT; primary hyperparathyroidism, T-score; bone density standard score, LS; lumbar spine, FN; femoral neck, FU time; follow-up time, AMI; acute myocardial infarction, BMI; body mass index
